# Supplementary material
Source: Research Square preprint supplement (doi:10.21203/rs.3.rs-9010841/v1)
Supplement: Supplementary file 1 [file 0c1c3406da26edba8ee608d4.xlsx]

## Sheet: Sheet1
Gene	Cell_Type	N_SNPs	OR	95%_CI	P_value	Direction	log2_OR	Significant
GSTM1	CD8+ T cells (Naive)	3	0.595	0.452-0.784	2.17e-04	Protective	-0.748	Yes
MAPK3	CD4+ T cells (Naive)	2	0.667	0.537-0.829	2.56e-04	Protective	-0.584	Yes
MAPK3	B cells (Naive)	3	0.677	0.544-0.844	5.29e-04	Protective	-0.562	Yes
GSTM1	CD4+ T cells (Naive)	6	0.764	0.654-0.894	7.70e-04	Protective	-0.387	Yes
MAPK3	CD4+ T cells (Effector)	4	1.388	1.089-1.769	8.11e-03	Risk	0.473	Yes
HRAS	CD8+ T cells (Effector)	6	0.814	0.687-0.964	1.70e-02	Protective	-0.297	Yes
GSTM1	CD8+ T cells (Effector)	3	0.755	0.574-0.994	4.52e-02	Protective	-0.405	Yes
MAPK3	NK cells	2	0.811	0.618-1.065	1.31e-01	Protective	-0.302	No
GSTM1	NK cells	10	0.878	0.729-1.056	1.67e-01	Protective	-0.188	No
HRAS	B cells (Naive)	2	0.831	0.627-1.101	1.96e-01	Protective	-0.267	No
MAP3K11	plasma	5	0.868	0.694-1.085	2.13e-01	Protective	-0.205	No
MAP3K11	CD4+ T cells (Effector)	2	1.322	0.826-2.115	2.45e-01	Risk	0.402	No
HRAS	bmem	3	0.865	0.655-1.143	3.08e-01	Protective	-0.209	No
HRAS	plasma	2	1.204	0.826-1.757	3.35e-01	Risk	0.268	No
AGPS	cd4sox4	2	1.336	0.719-2.481	3.59e-01	Risk	0.418	No
HRAS	CD4+ T cells (Naive)	11	0.954	0.830-1.098	5.11e-01	Protective	-0.068	No
MAPK3	mononc	2	1.161	0.720-1.871	5.40e-01	Risk	0.215	No
AGPS	CD4+ T cells (Naive)	5	1.061	0.823-1.369	6.46e-01	Risk	0.086	No
HRAS	CD4+ T cells (Effector)	2	0.920	0.598-1.418	7.07e-01	Protective	-0.120	No
HRAS	NK cells	7	1.017	0.824-1.256	8.74e-01	Risk	0.025	No
AGPS	plasma	6	0.980	0.756-1.269	8.76e-01	Protective	-0.030	No
