# Supplementary material
Source: Research Square preprint supplement (doi:10.21203/rs.3.rs-9010841/v1)

# Supplementary Figure 4. Effect Size vs. Number of Instrumental Variables

*No significant correlation between SNP count and effect size*

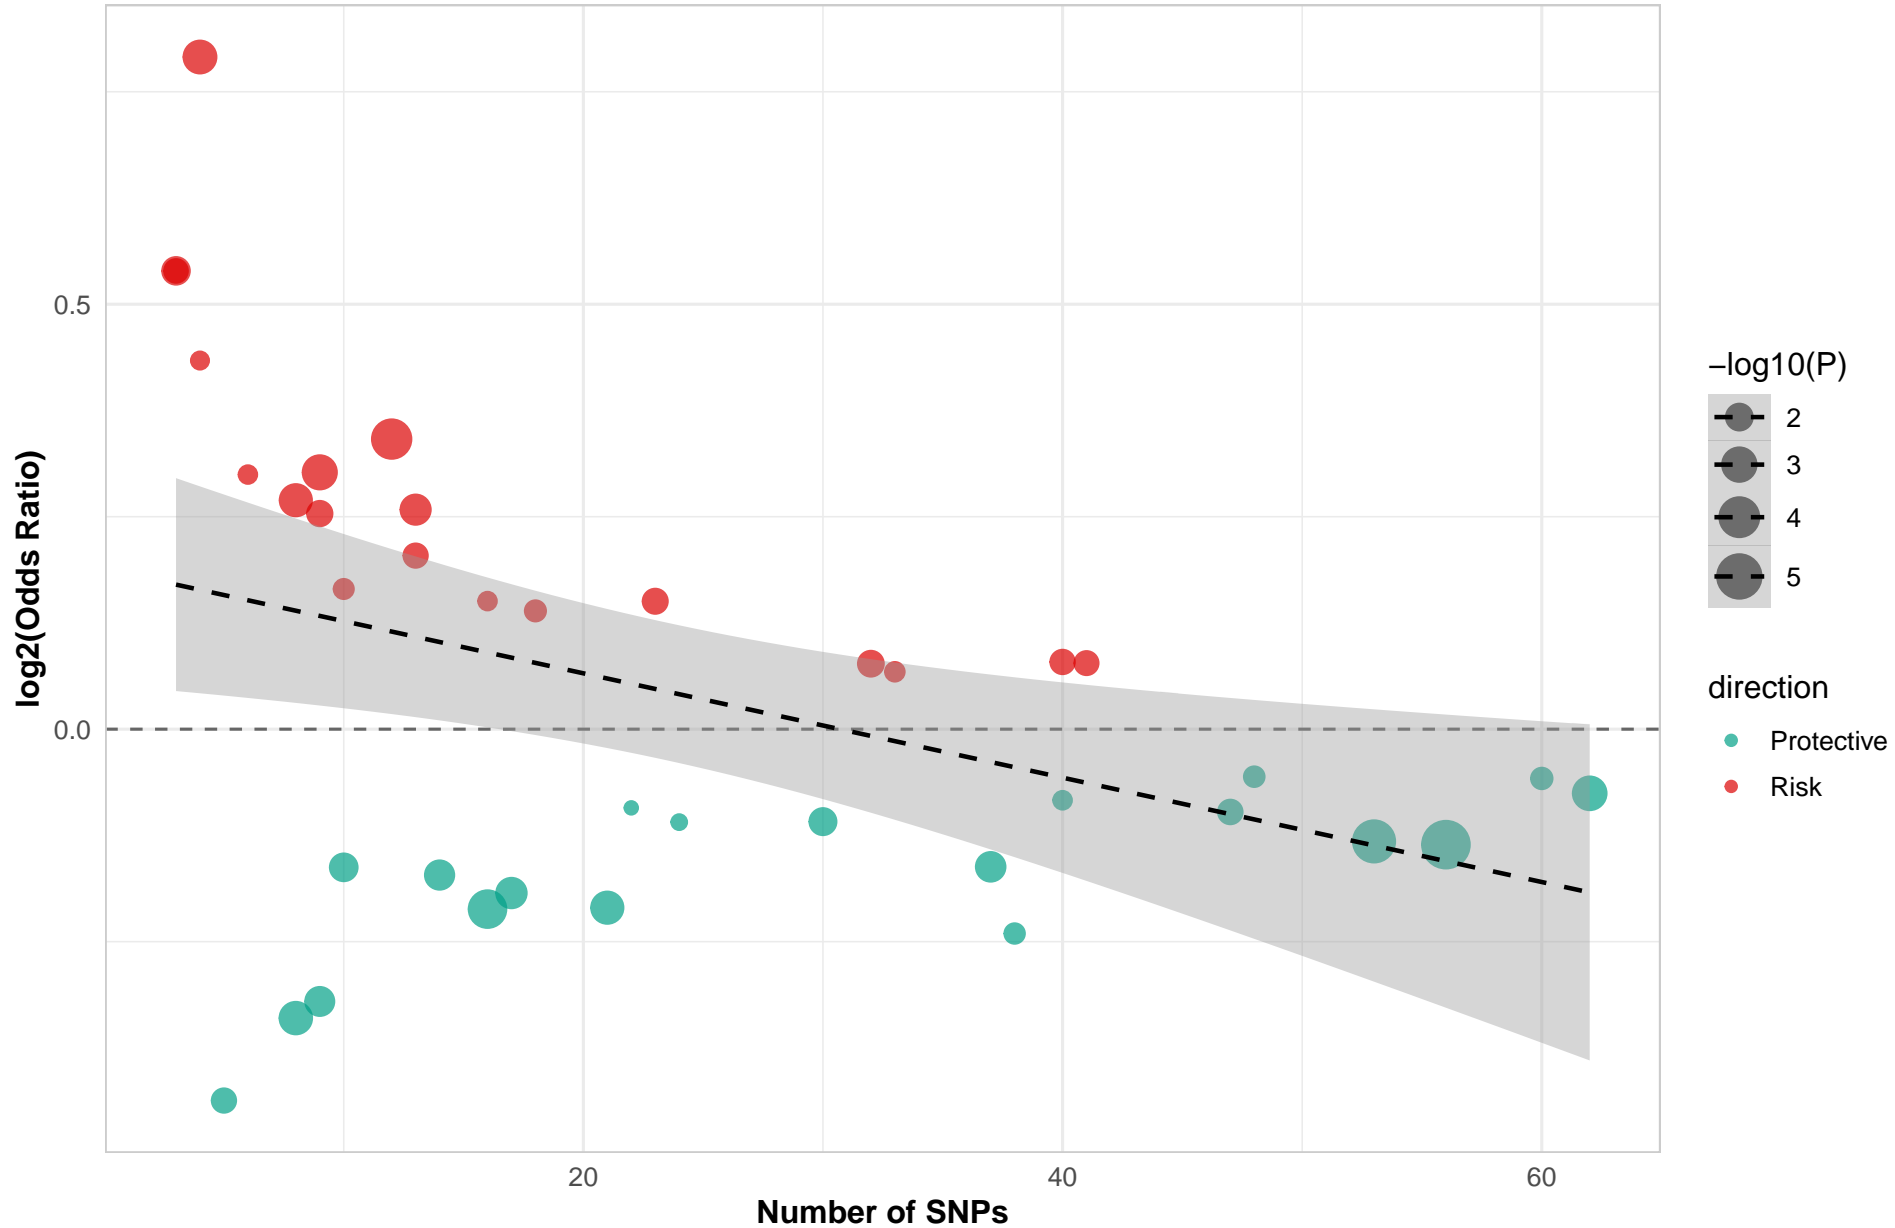

Supplement: Supplementary file 1 [file 1e0ed050eca4eebe50f7a31b.pdf]
