# Supplementary material
Source: Research Square preprint supplement (doi:10.21203/rs.3.rs-9010841/v1)

## Supplementary Figure 2. Distribution of Instrumental Variables

*Number of SNPs used for each gene in MR analysis*

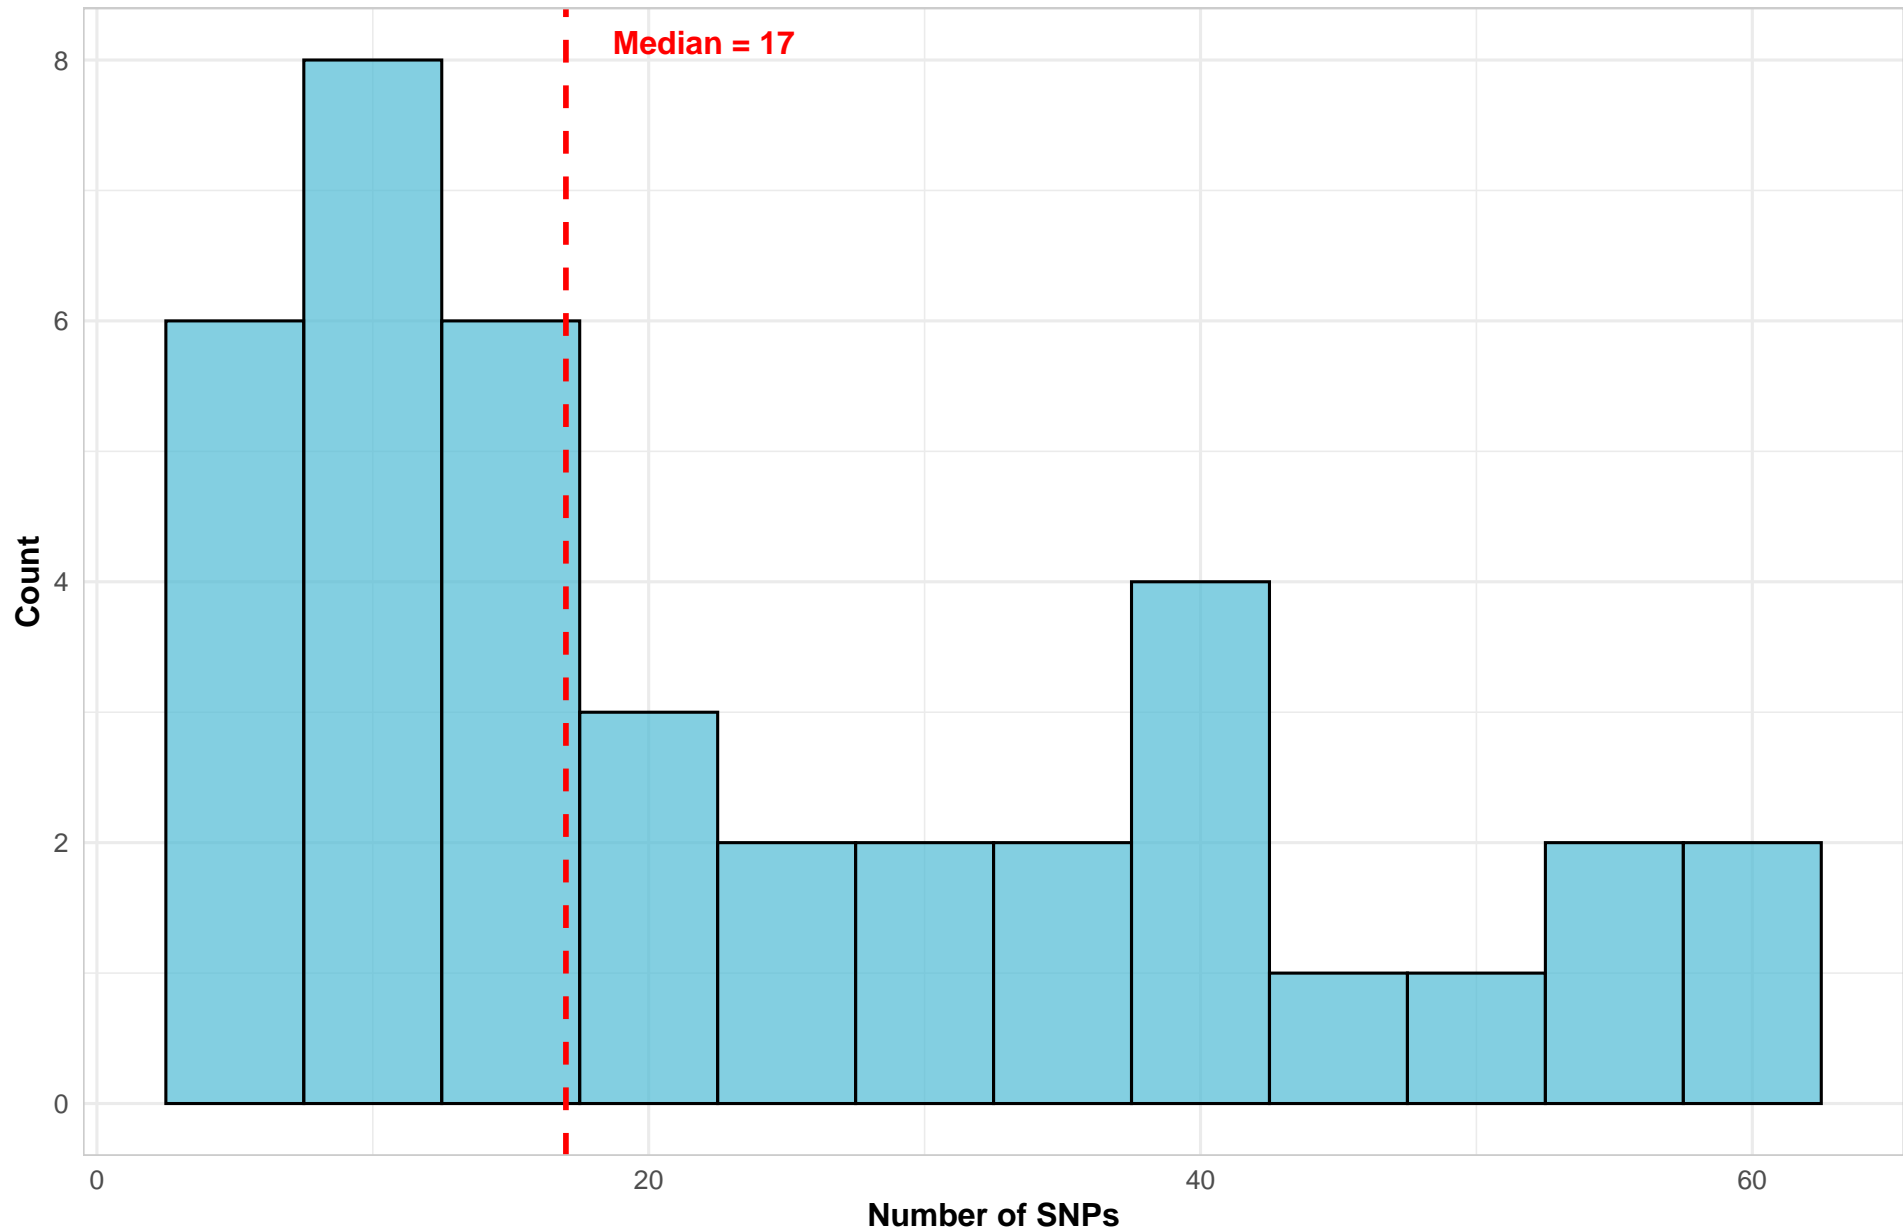

Supplement: Supplementary file 2 [file 6c1126df2f06a5bb1893fc83.pdf]
