# Supplementary material
Source: Research Square preprint supplement (doi:10.21203/rs.3.rs-9010841/v1)
Supplement: Supplementary file 2 [file 65b88f382a160a74dab617d0.xlsx]

## Sheet: Sheet1
Data_Source	Database	Sample_Size	Population	Description
NSCLC GWAS	FinnGen R12	385,195 (cases: 2,564)	European (Finnish)	Non-small cell lung cancer cases and controls
eQTL Database	eQTLGen Consortium	31,684	European	Whole blood cis-eQTL data
Ferroptosis Gene Database	FerrDb v2	483 genes	N/A	Curated ferroptosis-related genes
Single-cell eQTL - B cells (Naive)	OneK1K Project	982	European	Cell-type-specific cis-eQTL from PBMCs
Single-cell eQTL - CD4+ T cells (Effector)	OneK1K Project	982	European	Cell-type-specific cis-eQTL from PBMCs
Single-cell eQTL - CD4+ T cells (Naive)	OneK1K Project	982	European	Cell-type-specific cis-eQTL from PBMCs
Single-cell eQTL - CD8+ T cells (Effector)	OneK1K Project	982	European	Cell-type-specific cis-eQTL from PBMCs
Single-cell eQTL - CD8+ T cells (Naive)	OneK1K Project	982	European	Cell-type-specific cis-eQTL from PBMCs
Single-cell eQTL - CD14+ Monocytes	OneK1K Project	982	European	Cell-type-specific cis-eQTL from PBMCs
Single-cell eQTL - CD16+ Monocytes	OneK1K Project	982	European	Cell-type-specific cis-eQTL from PBMCs
Single-cell eQTL - Dendritic Cells	OneK1K Project	982	European	Cell-type-specific cis-eQTL from PBMCs
Single-cell eQTL - Megakaryocytes	OneK1K Project	982	European	Cell-type-specific cis-eQTL from PBMCs
Single-cell eQTL - NK cells	OneK1K Project	982	European	Cell-type-specific cis-eQTL from PBMCs
Single-cell eQTL - Plasma cells	OneK1K Project	982	European	Cell-type-specific cis-eQTL from PBMCs
Single-cell eQTL - Platelets	OneK1K Project	982	European	Cell-type-specific cis-eQTL from PBMCs
Single-cell eQTL - T regulatory cells	OneK1K Project	982	European	Cell-type-specific cis-eQTL from PBMCs
Single-cell eQTL - Transitional B cells	OneK1K Project	982	European	Cell-type-specific cis-eQTL from PBMCs
