# Supplementary material
Source: Research Square preprint supplement (doi:10.21203/rs.3.rs-9010841/v1)
Supplement: Supplementary file 4 [file a9f209a35b3ef7a10870f7c1.xlsx]

## Sheet: Sheet1
Gene	N_SNPs	OR	95%_CI	P_value	Direction	log2_OR	Significant
MAPK3	56	0.910	0.876-0.946	1.58e-06	Protective	-0.136	Yes
MAP3K11	53	0.913	0.874-0.953	3.37e-05	Protective	-0.132	Yes
HDDC3	12	1.267	1.123-1.430	1.27e-04	Risk	0.341	Yes
TMBIM4	16	0.864	0.798-0.935	2.80e-04	Protective	-0.212	Yes
CHP1	9	1.233	1.087-1.398	1.10e-03	Risk	0.302	Yes
GSTM1	62	0.949	0.919-0.980	1.30e-03	Protective	-0.075	Yes
ACADSB	4	1.730	1.228-2.437	1.71e-03	Risk	0.791	Yes
FAR1	8	0.790	0.681-0.917	1.97e-03	Protective	-0.340	Yes
VDR	21	0.865	0.788-0.949	2.16e-03	Protective	-0.210	Yes
NR1D1	8	1.205	1.070-1.358	2.19e-03	Risk	0.269	Yes
MAPK8	17	0.875	0.799-0.958	3.84e-03	Protective	-0.193	Yes
AGPS	13	1.196	1.058-1.352	4.09e-03	Risk	0.258	Yes
FADS1	37	0.894	0.827-0.966	4.85e-03	Protective	-0.162	Yes
STK11	14	0.888	0.817-0.965	5.34e-03	Protective	-0.172	Yes
PRR5	9	0.801	0.684-0.937	5.72e-03	Protective	-0.320	Yes
NCOA4	10	0.893	0.822-0.971	8.00e-03	Protective	-0.163	Yes
LYRM1	3	1.453	1.101-1.918	8.34e-03	Risk	0.539	Yes
ALOX15	30	0.927	0.876-0.982	9.55e-03	Protective	-0.109	Yes
LPIN1	32	1.055	1.012-1.100	1.25e-02	Risk	0.077	Yes
CISD2	9	1.192	1.036-1.372	1.40e-02	Risk	0.254	Yes
CYB5R1	23	1.110	1.021-1.207	1.47e-02	Risk	0.151	Yes
AKR1C2	47	0.935	0.885-0.988	1.63e-02	Protective	-0.097	Yes
CDO1	40	1.056	1.010-1.105	1.67e-02	Risk	0.079	Yes
IFNG	5	0.739	0.576-0.947	1.71e-02	Protective	-0.437	Yes
NEDD4L	13	1.152	1.025-1.294	1.73e-02	Risk	0.204	Yes
QSOX1	41	1.055	1.009-1.104	1.80e-02	Risk	0.078	Yes
PTPN18	3	1.453	1.062-1.987	1.93e-02	Risk	0.539	Yes
CAMKK2	60	0.961	0.927-0.996	2.75e-02	Protective	-0.058	Yes
HRAS	18	1.101	1.010-1.201	2.88e-02	Risk	0.139	Yes
GPX4	48	0.962	0.929-0.996	3.07e-02	Protective	-0.056	Yes
IREB2	38	0.846	0.727-0.985	3.15e-02	Protective	-0.240	Yes
MAPK14	10	1.121	1.009-1.245	3.27e-02	Risk	0.165	Yes
BRD7	33	1.048	1.003-1.094	3.46e-02	Risk	0.068	Yes
SLC40A1	40	0.944	0.893-0.997	3.79e-02	Protective	-0.084	Yes
JUN	16	1.110	1.006-1.225	3.82e-02	Risk	0.151	Yes
KDM6B	6	1.231	1.011-1.498	3.84e-02	Risk	0.300	Yes
PPARA	4	1.351	1.014-1.799	3.99e-02	Risk	0.434	Yes
NDRG1	24	0.927	0.861-0.999	4.58e-02	Protective	-0.109	Yes
NEDD4	22	0.938	0.880-0.999	4.80e-02	Protective	-0.093	Yes
