# Supplementary material
Source: Research Square preprint supplement (doi:10.21203/rs.3.rs-9010841/v1)

# Supplementary Figure 1. Complete Forest Plot of 40 NSCLC-Associated Ferroptosis Genes

Inverse variance weighted method; \*\*\*  $p < 0.001$ , \*\*  $p < 0.01$ , \*  $p < 0.05$

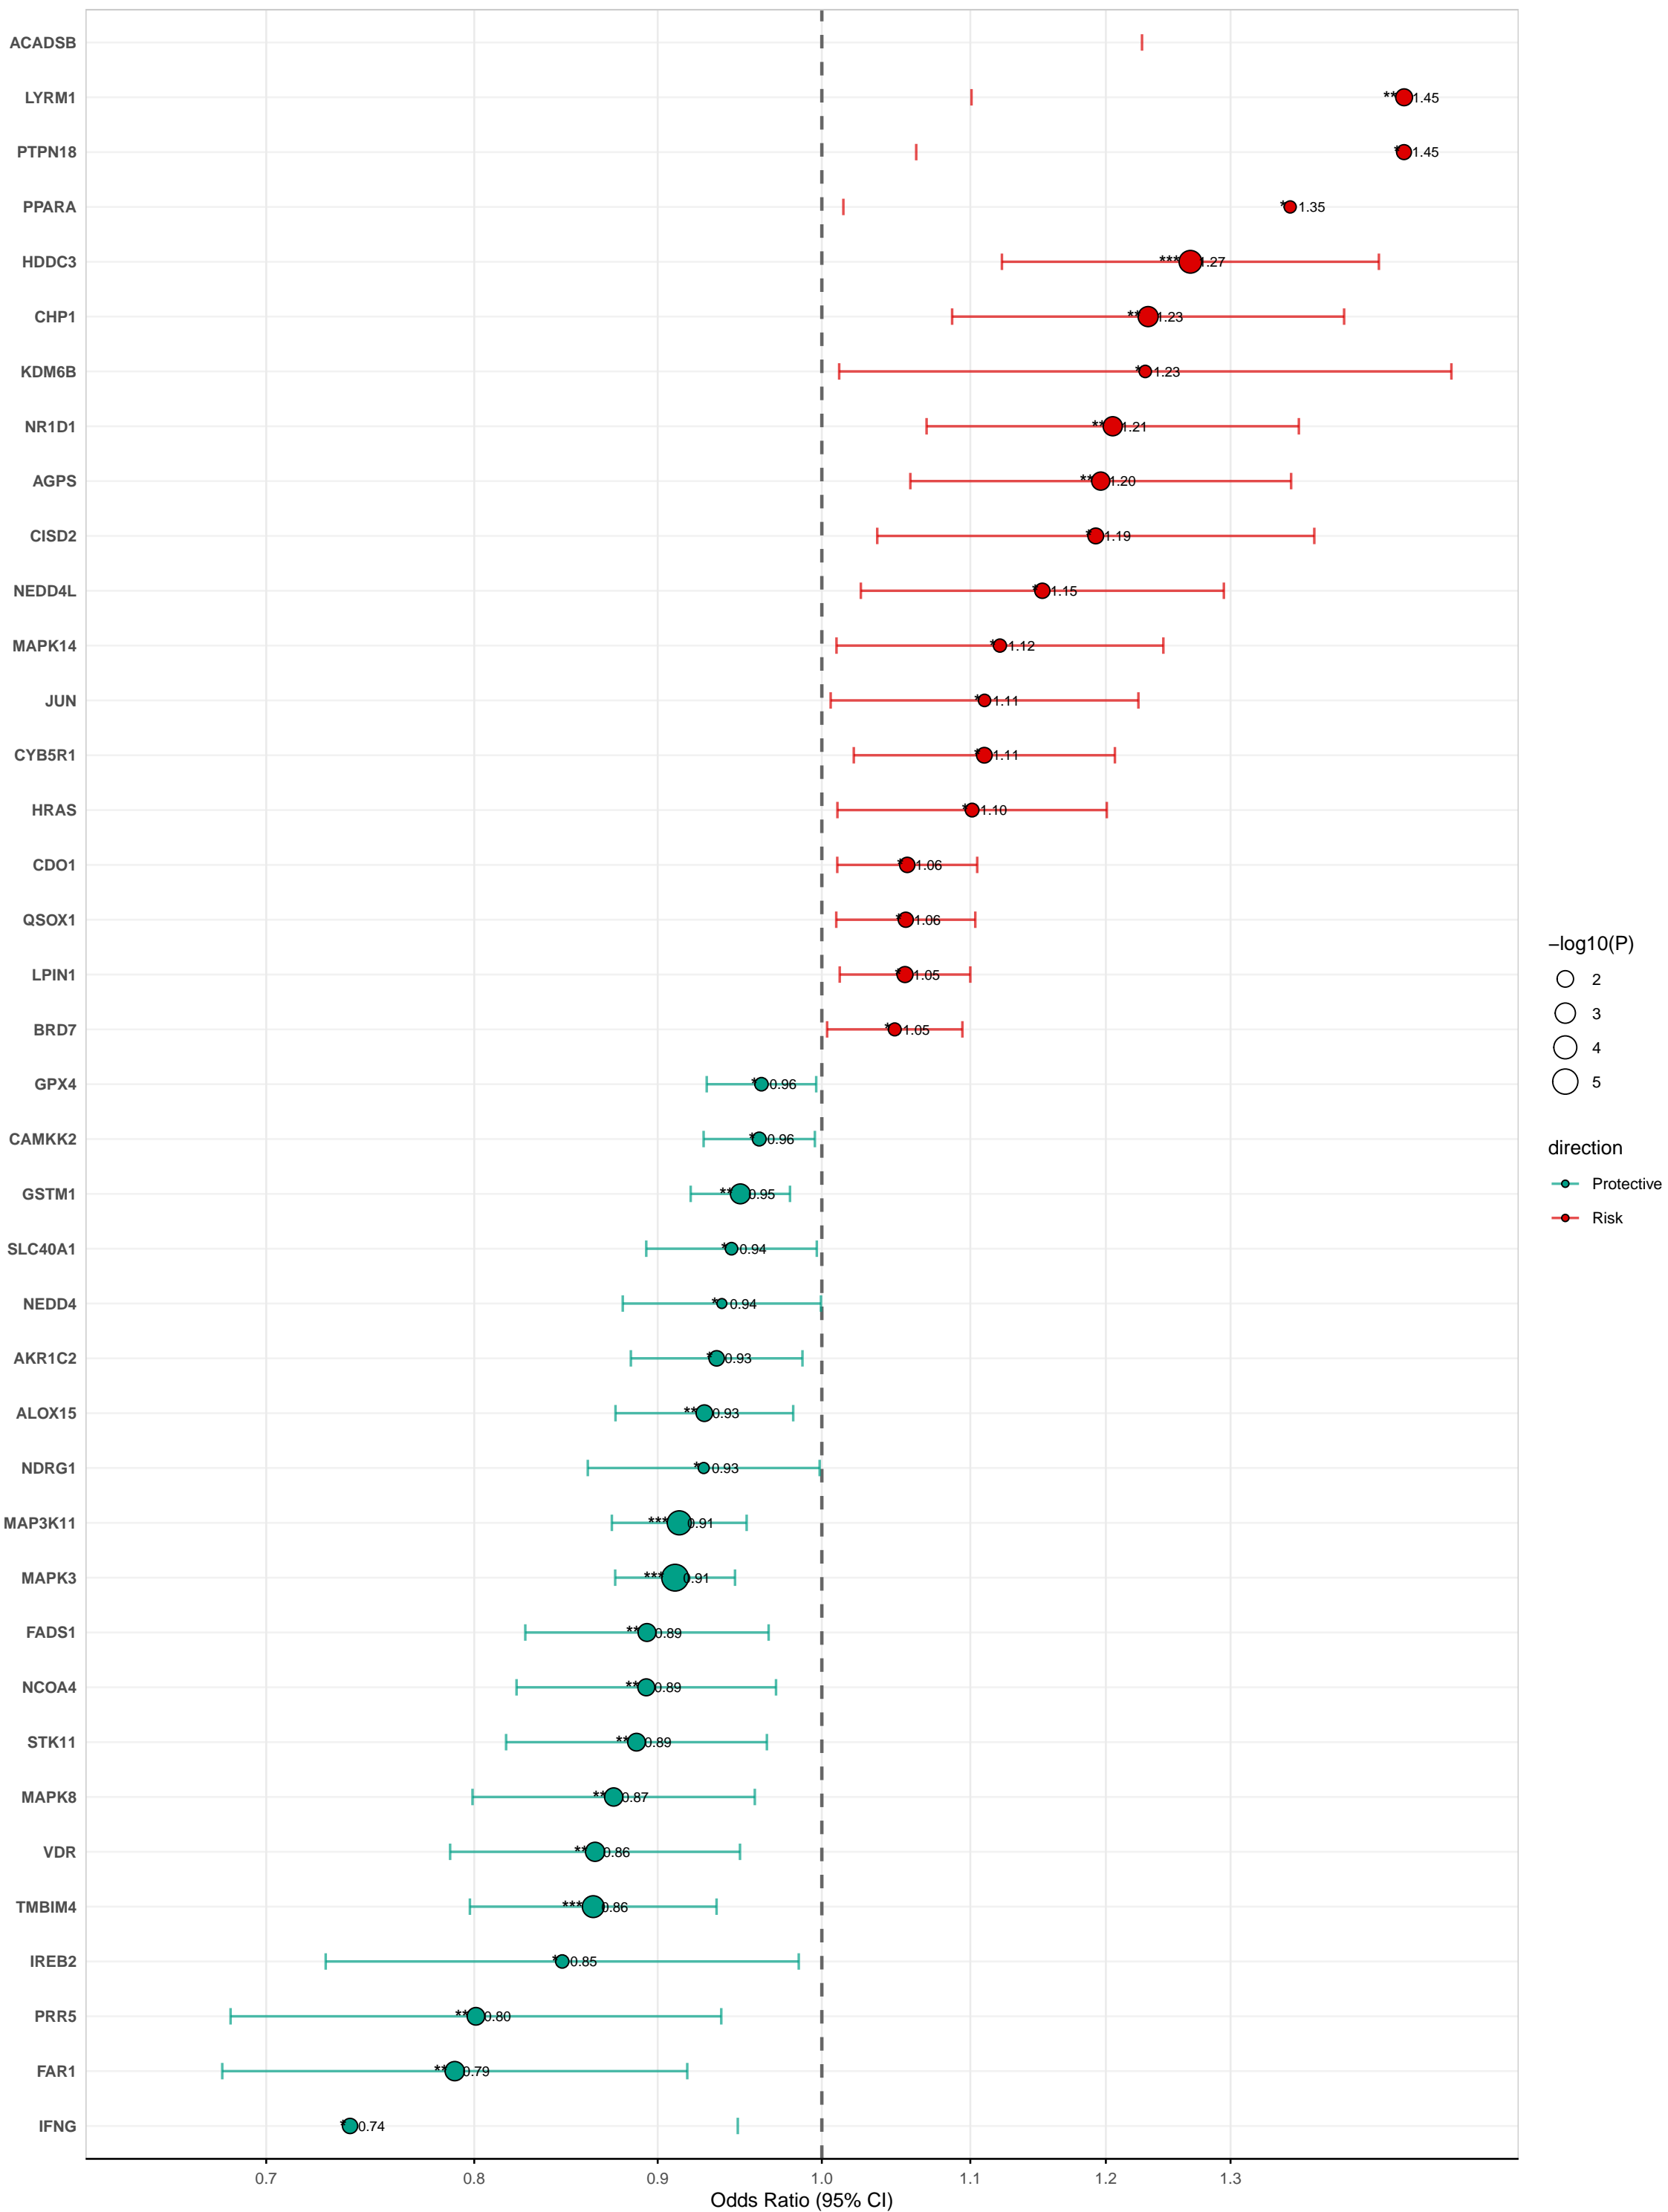

Supplement: Supplementary file 4 [file b783056d62c4082eef677577.pdf]
