# Supplementary material
Source: Research Square preprint supplement (doi:10.21203/rs.3.rs-9010841/v1)
Supplement: Supplementary file 5 [file d5f1d15bdce615143ef4cee0.xlsx]

## Sheet: Sheet1
Gene	Cell_Type	Method	N_SNPs	OR	95%_CI	P_value
MAPK3	Whole Blood (eQTL)	MR Egger	56	0.937	0.872-1.007	8.38e-02
MAPK3	Whole Blood (eQTL)	Weighted median	56	0.926	0.880-0.974	3.05e-03
MAPK3	Whole Blood (eQTL)	Inverse variance weighted	56	0.910	0.876-0.946	1.58e-06
MAPK3	Whole Blood (eQTL)	Simple mode	56	0.877	0.798-0.963	8.22e-03
MAPK3	Whole Blood (eQTL)	Weighted mode	56	0.916	0.871-0.963	1.23e-03
MAP3K11	Whole Blood (eQTL)	MR Egger	53	0.933	0.854-1.020	1.32e-01
MAP3K11	Whole Blood (eQTL)	Weighted median	53	0.914	0.858-0.975	6.06e-03
MAP3K11	Whole Blood (eQTL)	Inverse variance weighted	53	0.913	0.874-0.953	3.37e-05
MAP3K11	Whole Blood (eQTL)	Simple mode	53	0.908	0.828-0.997	4.88e-02
MAP3K11	Whole Blood (eQTL)	Weighted mode	53	0.911	0.854-0.972	6.95e-03
HDDC3	Whole Blood (eQTL)	MR Egger	12	1.455	1.088-1.946	2.99e-02
HDDC3	Whole Blood (eQTL)	Weighted median	12	1.291	1.106-1.506	1.18e-03
HDDC3	Whole Blood (eQTL)	Inverse variance weighted	12	1.267	1.123-1.430	1.27e-04
HDDC3	Whole Blood (eQTL)	Simple mode	12	1.351	1.088-1.676	1.97e-02
HDDC3	Whole Blood (eQTL)	Weighted mode	12	1.356	1.146-1.604	4.57e-03
TMBIM4	Whole Blood (eQTL)	MR Egger	16	0.786	0.679-0.910	6.03e-03
TMBIM4	Whole Blood (eQTL)	Weighted median	16	0.858	0.773-0.951	3.64e-03
TMBIM4	Whole Blood (eQTL)	Inverse variance weighted	16	0.864	0.798-0.935	2.80e-04
TMBIM4	Whole Blood (eQTL)	Simple mode	16	0.805	0.674-0.961	2.97e-02
TMBIM4	Whole Blood (eQTL)	Weighted mode	16	0.844	0.756-0.941	8.11e-03
CHP1	Whole Blood (eQTL)	MR Egger	9	1.253	0.985-1.593	1.09e-01
CHP1	Whole Blood (eQTL)	Weighted median	9	1.249	1.056-1.477	9.31e-03
CHP1	Whole Blood (eQTL)	Inverse variance weighted	9	1.233	1.087-1.398	1.10e-03
CHP1	Whole Blood (eQTL)	Simple mode	9	1.296	1.006-1.670	7.96e-02
CHP1	Whole Blood (eQTL)	Weighted mode	9	1.252	1.054-1.488	3.38e-02
GSTM1	Whole Blood (eQTL)	MR Egger	62	0.949	0.898-1.002	6.40e-02
GSTM1	Whole Blood (eQTL)	Weighted median	62	0.945	0.907-0.985	7.64e-03
GSTM1	Whole Blood (eQTL)	Inverse variance weighted	62	0.949	0.919-0.980	1.30e-03
GSTM1	Whole Blood (eQTL)	Simple mode	62	0.938	0.872-1.008	8.78e-02
GSTM1	Whole Blood (eQTL)	Weighted mode	62	0.935	0.894-0.977	3.97e-03
ACADSB	Whole Blood (eQTL)	MR Egger	4	2.638	0.492-14.139	3.75e-01
ACADSB	Whole Blood (eQTL)	Weighted median	4	1.709	1.127-2.592	1.17e-02
ACADSB	Whole Blood (eQTL)	Inverse variance weighted	4	1.730	1.228-2.437	1.71e-03
ACADSB	Whole Blood (eQTL)	Simple mode	4	1.691	1.000-2.859	1.45e-01
ACADSB	Whole Blood (eQTL)	Weighted mode	4	1.665	1.044-2.655	1.22e-01
FAR1	Whole Blood (eQTL)	MR Egger	8	0.766	0.560-1.048	1.46e-01
FAR1	Whole Blood (eQTL)	Weighted median	8	0.749	0.618-0.908	3.24e-03
FAR1	Whole Blood (eQTL)	Inverse variance weighted	8	0.790	0.681-0.917	1.97e-03
FAR1	Whole Blood (eQTL)	Simple mode	8	0.757	0.547-1.047	1.36e-01
FAR1	Whole Blood (eQTL)	Weighted mode	8	0.726	0.588-0.897	2.07e-02
VDR	Whole Blood (eQTL)	MR Egger	21	1.054	0.826-1.346	6.76e-01
VDR	Whole Blood (eQTL)	Weighted median	21	0.858	0.750-0.982	2.56e-02
VDR	Whole Blood (eQTL)	Inverse variance weighted	21	0.865	0.788-0.949	2.16e-03
VDR	Whole Blood (eQTL)	Simple mode	21	0.728	0.569-0.931	1.99e-02
VDR	Whole Blood (eQTL)	Weighted mode	21	0.805	0.660-0.982	4.48e-02
NR1D1	Whole Blood (eQTL)	MR Egger	8	1.169	0.904-1.512	2.79e-01
NR1D1	Whole Blood (eQTL)	Weighted median	8	1.190	1.043-1.358	9.86e-03
NR1D1	Whole Blood (eQTL)	Inverse variance weighted	8	1.205	1.070-1.358	2.19e-03
NR1D1	Whole Blood (eQTL)	Simple mode	8	1.048	0.830-1.322	7.06e-01
NR1D1	Whole Blood (eQTL)	Weighted mode	8	1.158	1.002-1.340	8.80e-02
MAPK8	Whole Blood (eQTL)	MR Egger	17	0.812	0.660-1.000	6.87e-02
MAPK8	Whole Blood (eQTL)	Weighted median	17	0.853	0.758-0.960	8.37e-03
MAPK8	Whole Blood (eQTL)	Inverse variance weighted	17	0.875	0.799-0.958	3.84e-03
MAPK8	Whole Blood (eQTL)	Simple mode	17	0.868	0.709-1.063	1.91e-01
MAPK8	Whole Blood (eQTL)	Weighted mode	17	0.845	0.742-0.963	2.23e-02
AGPS	Whole Blood (eQTL)	MR Egger	13	1.191	0.952-1.490	1.54e-01
AGPS	Whole Blood (eQTL)	Weighted median	13	1.211	1.073-1.368	1.98e-03
AGPS	Whole Blood (eQTL)	Inverse variance weighted	13	1.196	1.058-1.352	4.09e-03
AGPS	Whole Blood (eQTL)	Simple mode	13	1.232	1.007-1.506	6.51e-02
AGPS	Whole Blood (eQTL)	Weighted mode	13	1.201	1.061-1.359	1.33e-02
FADS1	Whole Blood (eQTL)	MR Egger	37	0.969	0.851-1.103	6.37e-01
FADS1	Whole Blood (eQTL)	Weighted median	37	0.829	0.752-0.914	1.66e-04
FADS1	Whole Blood (eQTL)	Inverse variance weighted	37	0.894	0.827-0.966	4.85e-03
FADS1	Whole Blood (eQTL)	Simple mode	37	0.998	0.785-1.267	9.84e-01
FADS1	Whole Blood (eQTL)	Weighted mode	37	0.854	0.767-0.951	6.81e-03
STK11	Whole Blood (eQTL)	MR Egger	14	0.962	0.827-1.120	6.29e-01
STK11	Whole Blood (eQTL)	Weighted median	14	0.887	0.798-0.986	2.67e-02
STK11	Whole Blood (eQTL)	Inverse variance weighted	14	0.888	0.817-0.965	5.34e-03
STK11	Whole Blood (eQTL)	Simple mode	14	0.823	0.688-0.984	5.27e-02
STK11	Whole Blood (eQTL)	Weighted mode	14	0.885	0.800-0.978	3.23e-02
PRR5	Whole Blood (eQTL)	MR Egger	9	0.683	0.417-1.118	1.73e-01
PRR5	Whole Blood (eQTL)	Weighted median	9	0.809	0.662-0.989	3.91e-02
PRR5	Whole Blood (eQTL)	Inverse variance weighted	9	0.801	0.684-0.937	5.72e-03
PRR5	Whole Blood (eQTL)	Simple mode	9	0.833	0.598-1.160	3.11e-01
PRR5	Whole Blood (eQTL)	Weighted mode	9	0.845	0.620-1.153	3.19e-01
NCOA4	Whole Blood (eQTL)	MR Egger	10	0.877	0.644-1.194	4.28e-01
NCOA4	Whole Blood (eQTL)	Weighted median	10	0.900	0.820-0.989	2.79e-02
NCOA4	Whole Blood (eQTL)	Inverse variance weighted	10	0.893	0.822-0.971	8.00e-03
NCOA4	Whole Blood (eQTL)	Simple mode	10	0.945	0.833-1.073	4.08e-01
NCOA4	Whole Blood (eQTL)	Weighted mode	10	0.904	0.826-0.989	5.61e-02
LYRM1	Whole Blood (eQTL)	MR Egger	3	2.643	0.962-7.257	3.10e-01
LYRM1	Whole Blood (eQTL)	Weighted median	3	1.457	1.064-1.996	1.90e-02
LYRM1	Whole Blood (eQTL)	Inverse variance weighted	3	1.453	1.101-1.918	8.34e-03
LYRM1	Whole Blood (eQTL)	Simple mode	3	1.737	1.042-2.897	1.69e-01
LYRM1	Whole Blood (eQTL)	Weighted mode	3	1.250	0.883-1.771	3.36e-01
ALOX15	Whole Blood (eQTL)	MR Egger	30	0.955	0.862-1.058	3.86e-01
ALOX15	Whole Blood (eQTL)	Weighted median	30	0.920	0.844-1.002	5.56e-02
ALOX15	Whole Blood (eQTL)	Inverse variance weighted	30	0.927	0.876-0.982	9.55e-03
ALOX15	Whole Blood (eQTL)	Simple mode	30	0.883	0.764-1.021	1.03e-01
ALOX15	Whole Blood (eQTL)	Weighted mode	30	0.910	0.838-0.989	3.51e-02
LPIN1	Whole Blood (eQTL)	MR Egger	32	1.032	0.959-1.110	4.07e-01
LPIN1	Whole Blood (eQTL)	Weighted median	32	1.038	0.979-1.100	2.14e-01
LPIN1	Whole Blood (eQTL)	Inverse variance weighted	32	1.055	1.012-1.100	1.25e-02
LPIN1	Whole Blood (eQTL)	Simple mode	32	1.038	0.961-1.121	3.54e-01
LPIN1	Whole Blood (eQTL)	Weighted mode	32	1.038	0.982-1.097	1.95e-01
CISD2	Whole Blood (eQTL)	MR Egger	9	1.046	0.764-1.433	7.85e-01
CISD2	Whole Blood (eQTL)	Weighted median	9	1.185	1.003-1.402	4.66e-02
CISD2	Whole Blood (eQTL)	Inverse variance weighted	9	1.192	1.036-1.372	1.40e-02
CISD2	Whole Blood (eQTL)	Simple mode	9	1.128	0.822-1.548	4.78e-01
CISD2	Whole Blood (eQTL)	Weighted mode	9	1.176	0.997-1.388	9.11e-02
CYB5R1	Whole Blood (eQTL)	MR Egger	23	1.093	0.946-1.263	2.42e-01
CYB5R1	Whole Blood (eQTL)	Weighted median	23	1.127	1.004-1.264	4.26e-02
CYB5R1	Whole Blood (eQTL)	Inverse variance weighted	23	1.110	1.021-1.207	1.47e-02
CYB5R1	Whole Blood (eQTL)	Simple mode	23	1.070	0.856-1.338	5.58e-01
CYB5R1	Whole Blood (eQTL)	Weighted mode	23	1.114	0.989-1.255	8.85e-02
AKR1C2	Whole Blood (eQTL)	MR Egger	47	0.968	0.889-1.053	4.48e-01
AKR1C2	Whole Blood (eQTL)	Weighted median	47	0.925	0.869-0.984	1.34e-02
AKR1C2	Whole Blood (eQTL)	Inverse variance weighted	47	0.935	0.885-0.988	1.63e-02
AKR1C2	Whole Blood (eQTL)	Simple mode	47	1.033	0.903-1.181	6.40e-01
AKR1C2	Whole Blood (eQTL)	Weighted mode	47	0.955	0.907-1.006	9.24e-02
CDO1	Whole Blood (eQTL)	MR Egger	40	1.049	0.983-1.118	1.55e-01
CDO1	Whole Blood (eQTL)	Weighted median	40	1.049	0.989-1.113	1.10e-01
CDO1	Whole Blood (eQTL)	Inverse variance weighted	40	1.056	1.010-1.105	1.67e-02
CDO1	Whole Blood (eQTL)	Simple mode	40	1.096	0.968-1.242	1.56e-01
CDO1	Whole Blood (eQTL)	Weighted mode	40	1.051	0.990-1.115	1.09e-01
IFNG	Whole Blood (eQTL)	MR Egger	5	0.997	0.443-2.244	9.95e-01
IFNG	Whole Blood (eQTL)	Weighted median	5	0.680	0.508-0.911	9.67e-03
IFNG	Whole Blood (eQTL)	Inverse variance weighted	5	0.739	0.576-0.947	1.71e-02
IFNG	Whole Blood (eQTL)	Simple mode	5	0.676	0.451-1.013	1.30e-01
IFNG	Whole Blood (eQTL)	Weighted mode	5	0.665	0.468-0.946	8.56e-02
NEDD4L	Whole Blood (eQTL)	MR Egger	13	1.231	0.864-1.753	2.75e-01
NEDD4L	Whole Blood (eQTL)	Weighted median	13	1.104	0.939-1.298	2.31e-01
NEDD4L	Whole Blood (eQTL)	Inverse variance weighted	13	1.152	1.025-1.294	1.73e-02
NEDD4L	Whole Blood (eQTL)	Simple mode	13	1.046	0.803-1.363	7.44e-01
NEDD4L	Whole Blood (eQTL)	Weighted mode	13	1.074	0.872-1.322	5.17e-01
QSOX1	Whole Blood (eQTL)	MR Egger	41	1.028	0.946-1.117	5.15e-01
QSOX1	Whole Blood (eQTL)	Weighted median	41	1.041	0.978-1.108	2.06e-01
QSOX1	Whole Blood (eQTL)	Inverse variance weighted	41	1.055	1.009-1.104	1.80e-02
QSOX1	Whole Blood (eQTL)	Simple mode	41	1.020	0.909-1.145	7.37e-01
QSOX1	Whole Blood (eQTL)	Weighted mode	41	1.046	0.979-1.119	1.92e-01
PTPN18	Whole Blood (eQTL)	MR Egger	3	2.201	0.730-6.635	3.95e-01
PTPN18	Whole Blood (eQTL)	Weighted median	3	1.484	1.058-2.081	2.23e-02
PTPN18	Whole Blood (eQTL)	Inverse variance weighted	3	1.453	1.062-1.987	1.93e-02
PTPN18	Whole Blood (eQTL)	Simple mode	3	1.439	0.856-2.420	3.04e-01
PTPN18	Whole Blood (eQTL)	Weighted mode	3	1.607	1.035-2.496	1.69e-01
CAMKK2	Whole Blood (eQTL)	MR Egger	60	0.954	0.892-1.021	1.79e-01
CAMKK2	Whole Blood (eQTL)	Weighted median	60	0.944	0.894-0.996	3.47e-02
CAMKK2	Whole Blood (eQTL)	Inverse variance weighted	60	0.961	0.927-0.996	2.75e-02
CAMKK2	Whole Blood (eQTL)	Simple mode	60	0.935	0.854-1.022	1.45e-01
CAMKK2	Whole Blood (eQTL)	Weighted mode	60	0.956	0.905-1.009	1.07e-01
HRAS	Whole Blood (eQTL)	MR Egger	18	1.169	0.984-1.388	9.44e-02
HRAS	Whole Blood (eQTL)	Weighted median	18	1.116	0.988-1.261	7.62e-02
HRAS	Whole Blood (eQTL)	Inverse variance weighted	18	1.101	1.010-1.201	2.88e-02
HRAS	Whole Blood (eQTL)	Simple mode	18	1.158	0.957-1.403	1.51e-01
HRAS	Whole Blood (eQTL)	Weighted mode	18	1.140	0.997-1.303	7.18e-02
GPX4	Whole Blood (eQTL)	MR Egger	48	0.983	0.924-1.046	5.96e-01
GPX4	Whole Blood (eQTL)	Weighted median	48	0.957	0.912-1.004	7.14e-02
GPX4	Whole Blood (eQTL)	Inverse variance weighted	48	0.962	0.929-0.996	3.07e-02
GPX4	Whole Blood (eQTL)	Simple mode	48	0.983	0.894-1.081	7.27e-01
GPX4	Whole Blood (eQTL)	Weighted mode	48	0.966	0.919-1.016	1.88e-01
IREB2	Whole Blood (eQTL)	MR Egger	38	0.963	0.755-1.229	7.66e-01
IREB2	Whole Blood (eQTL)	Weighted median	38	0.820	0.750-0.897	1.40e-05
IREB2	Whole Blood (eQTL)	Inverse variance weighted	38	0.846	0.727-0.985	3.15e-02
IREB2	Whole Blood (eQTL)	Simple mode	38	0.651	0.518-0.817	7.13e-04
IREB2	Whole Blood (eQTL)	Weighted mode	38	0.736	0.664-0.816	1.10e-06
MAPK14	Whole Blood (eQTL)	MR Egger	10	1.104	0.854-1.427	4.73e-01
MAPK14	Whole Blood (eQTL)	Weighted median	10	1.092	0.955-1.249	1.99e-01
MAPK14	Whole Blood (eQTL)	Inverse variance weighted	10	1.121	1.009-1.245	3.27e-02
MAPK14	Whole Blood (eQTL)	Simple mode	10	1.097	0.919-1.310	3.32e-01
MAPK14	Whole Blood (eQTL)	Weighted mode	10	1.103	0.956-1.274	2.13e-01
BRD7	Whole Blood (eQTL)	MR Egger	33	1.018	0.947-1.093	6.38e-01
BRD7	Whole Blood (eQTL)	Weighted median	33	1.040	0.974-1.109	2.42e-01
BRD7	Whole Blood (eQTL)	Inverse variance weighted	33	1.048	1.003-1.094	3.46e-02
BRD7	Whole Blood (eQTL)	Simple mode	33	1.004	0.894-1.127	9.52e-01
BRD7	Whole Blood (eQTL)	Weighted mode	33	1.031	0.975-1.091	2.90e-01
SLC40A1	Whole Blood (eQTL)	MR Egger	40	0.943	0.829-1.073	3.81e-01
SLC40A1	Whole Blood (eQTL)	Weighted median	40	0.945	0.866-1.030	1.95e-01
SLC40A1	Whole Blood (eQTL)	Inverse variance weighted	40	0.944	0.893-0.997	3.79e-02
SLC40A1	Whole Blood (eQTL)	Simple mode	40	0.981	0.854-1.128	7.94e-01
SLC40A1	Whole Blood (eQTL)	Weighted mode	40	0.953	0.871-1.043	3.04e-01
JUN	Whole Blood (eQTL)	MR Egger	16	1.096	0.881-1.364	4.24e-01
JUN	Whole Blood (eQTL)	Weighted median	16	1.156	1.008-1.326	3.82e-02
JUN	Whole Blood (eQTL)	Inverse variance weighted	16	1.110	1.006-1.225	3.82e-02
JUN	Whole Blood (eQTL)	Simple mode	16	1.242	0.986-1.564	8.58e-02
JUN	Whole Blood (eQTL)	Weighted mode	16	1.179	1.016-1.368	4.64e-02
KDM6B	Whole Blood (eQTL)	MR Egger	6	1.003	0.735-1.369	9.85e-01
KDM6B	Whole Blood (eQTL)	Weighted median	6	1.139	0.934-1.389	1.98e-01
KDM6B	Whole Blood (eQTL)	Inverse variance weighted	6	1.231	1.011-1.498	3.84e-02
KDM6B	Whole Blood (eQTL)	Simple mode	6	1.276	0.771-2.109	3.86e-01
KDM6B	Whole Blood (eQTL)	Weighted mode	6	1.084	0.869-1.351	5.07e-01
PPARA	Whole Blood (eQTL)	MR Egger	4	1.643	0.774-3.486	3.25e-01
PPARA	Whole Blood (eQTL)	Weighted median	4	1.286	0.916-1.804	1.46e-01
PPARA	Whole Blood (eQTL)	Inverse variance weighted	4	1.351	1.014-1.799	3.99e-02
PPARA	Whole Blood (eQTL)	Simple mode	4	1.161	0.720-1.870	5.84e-01
PPARA	Whole Blood (eQTL)	Weighted mode	4	1.173	0.739-1.861	5.48e-01
NDRG1	Whole Blood (eQTL)	MR Egger	24	0.971	0.829-1.137	7.17e-01
NDRG1	Whole Blood (eQTL)	Weighted median	24	0.984	0.882-1.098	7.72e-01
NDRG1	Whole Blood (eQTL)	Inverse variance weighted	24	0.927	0.861-0.999	4.58e-02
NDRG1	Whole Blood (eQTL)	Simple mode	24	0.993	0.807-1.223	9.51e-01
NDRG1	Whole Blood (eQTL)	Weighted mode	24	0.990	0.888-1.103	8.58e-01
NEDD4	Whole Blood (eQTL)	MR Egger	22	0.935	0.839-1.041	2.34e-01
NEDD4	Whole Blood (eQTL)	Weighted median	22	0.920	0.845-1.002	5.42e-02
NEDD4	Whole Blood (eQTL)	Inverse variance weighted	22	0.938	0.880-0.999	4.80e-02
NEDD4	Whole Blood (eQTL)	Simple mode	22	0.955	0.827-1.102	5.33e-01
NEDD4	Whole Blood (eQTL)	Weighted mode	22	0.922	0.850-1.000	6.27e-02
GSTM1	CD8+ T cells (Naive)	MR Egger	3	15.833	0.078-3217.035	4.94e-01
GSTM1	CD8+ T cells (Naive)	Weighted median	3	0.595	0.364-0.972	3.81e-02
GSTM1	CD8+ T cells (Naive)	Inverse variance weighted	3	0.595	0.452-0.784	2.17e-04
GSTM1	CD8+ T cells (Naive)	Simple mode	3	0.432	0.239-0.782	1.09e-01
GSTM1	CD8+ T cells (Naive)	Weighted mode	3	0.658	0.440-0.983	1.77e-01
MAPK3	CD4+ T cells (Naive)	Inverse variance weighted	2	0.667	0.537-0.829	2.56e-04
MAPK3	B cells (Naive)	MR Egger	3	0.000	0.000-2981.290	4.46e-01
MAPK3	B cells (Naive)	Weighted median	3	0.644	0.453-0.915	1.42e-02
MAPK3	B cells (Naive)	Inverse variance weighted	3	0.677	0.544-0.844	5.29e-04
MAPK3	B cells (Naive)	Simple mode	3	0.632	0.430-0.929	1.45e-01
MAPK3	B cells (Naive)	Weighted mode	3	0.634	0.427-0.942	1.53e-01
GSTM1	CD4+ T cells (Naive)	MR Egger	6	0.408	0.134-1.243	1.90e-01
GSTM1	CD4+ T cells (Naive)	Weighted median	6	0.779	0.631-0.962	2.01e-02
GSTM1	CD4+ T cells (Naive)	Inverse variance weighted	6	0.764	0.654-0.894	7.70e-04
GSTM1	CD4+ T cells (Naive)	Simple mode	6	0.816	0.633-1.051	1.76e-01
GSTM1	CD4+ T cells (Naive)	Weighted mode	6	0.776	0.612-0.984	9.07e-02
MAPK3	CD4+ T cells (Effector)	MR Egger	4	0.522	0.001-264.610	8.57e-01
MAPK3	CD4+ T cells (Effector)	Weighted median	4	1.460	1.102-1.935	8.37e-03
MAPK3	CD4+ T cells (Effector)	Inverse variance weighted	4	1.388	1.089-1.769	8.11e-03
MAPK3	CD4+ T cells (Effector)	Simple mode	4	1.579	1.104-2.257	8.73e-02
MAPK3	CD4+ T cells (Effector)	Weighted mode	4	1.502	1.100-2.050	8.32e-02
HRAS	CD8+ T cells (Effector)	MR Egger	6	0.756	0.161-3.541	7.40e-01
HRAS	CD8+ T cells (Effector)	Weighted median	6	0.843	0.691-1.029	9.28e-02
HRAS	CD8+ T cells (Effector)	Inverse variance weighted	6	0.814	0.687-0.964	1.70e-02
HRAS	CD8+ T cells (Effector)	Simple mode	6	0.838	0.603-1.164	3.40e-01
HRAS	CD8+ T cells (Effector)	Weighted mode	6	0.835	0.635-1.099	2.55e-01
GSTM1	CD8+ T cells (Effector)	MR Egger	3	0.131	0.011-1.565	3.54e-01
GSTM1	CD8+ T cells (Effector)	Weighted median	3	0.847	0.589-1.218	3.69e-01
GSTM1	CD8+ T cells (Effector)	Inverse variance weighted	3	0.755	0.574-0.994	4.52e-02
GSTM1	CD8+ T cells (Effector)	Simple mode	3	0.847	0.539-1.330	5.45e-01
GSTM1	CD8+ T cells (Effector)	Weighted mode	3	0.852	0.595-1.221	4.75e-01
