# Supplementary material
Source: Research Square preprint supplement (doi:10.21203/rs.3.rs-9010841/v1)
Supplement: Supplementary file 6 [file fa2ef00252453db059af6ff6.xlsx]

## Sheet: Sheet1
Gene	Cell_Type	N_SNPs	OR	95%_CI	P_value	Direction	log2_OR	Significance
GSTM1	CD8+ T cells (Naive)	3	0.595	0.452-0.784	2.17e-04	Protective	-0.748	***
MAPK3	CD4+ T cells (Naive)	2	0.667	0.537-0.829	2.56e-04	Protective	-0.584	***
MAPK3	B cells (Naive)	3	0.677	0.544-0.844	5.29e-04	Protective	-0.562	***
GSTM1	CD4+ T cells (Naive)	6	0.764	0.654-0.894	7.70e-04	Protective	-0.387	***
MAPK3	CD4+ T cells (Effector)	4	1.388	1.089-1.769	8.11e-03	Risk	0.473	**
HRAS	CD8+ T cells (Effector)	6	0.814	0.687-0.964	1.70e-02	Protective	-0.297	*
GSTM1	CD8+ T cells (Effector)	3	0.755	0.574-0.994	4.52e-02	Protective	-0.405	*
