# Supplementary material
Source: Research Square preprint supplement (doi:10.21203/rs.3.rs-9010841/v1)

### Supplementary Figure 3. Distribution of P-values

*All 40 genes passed significance threshold ( $p < 0.05$ )*

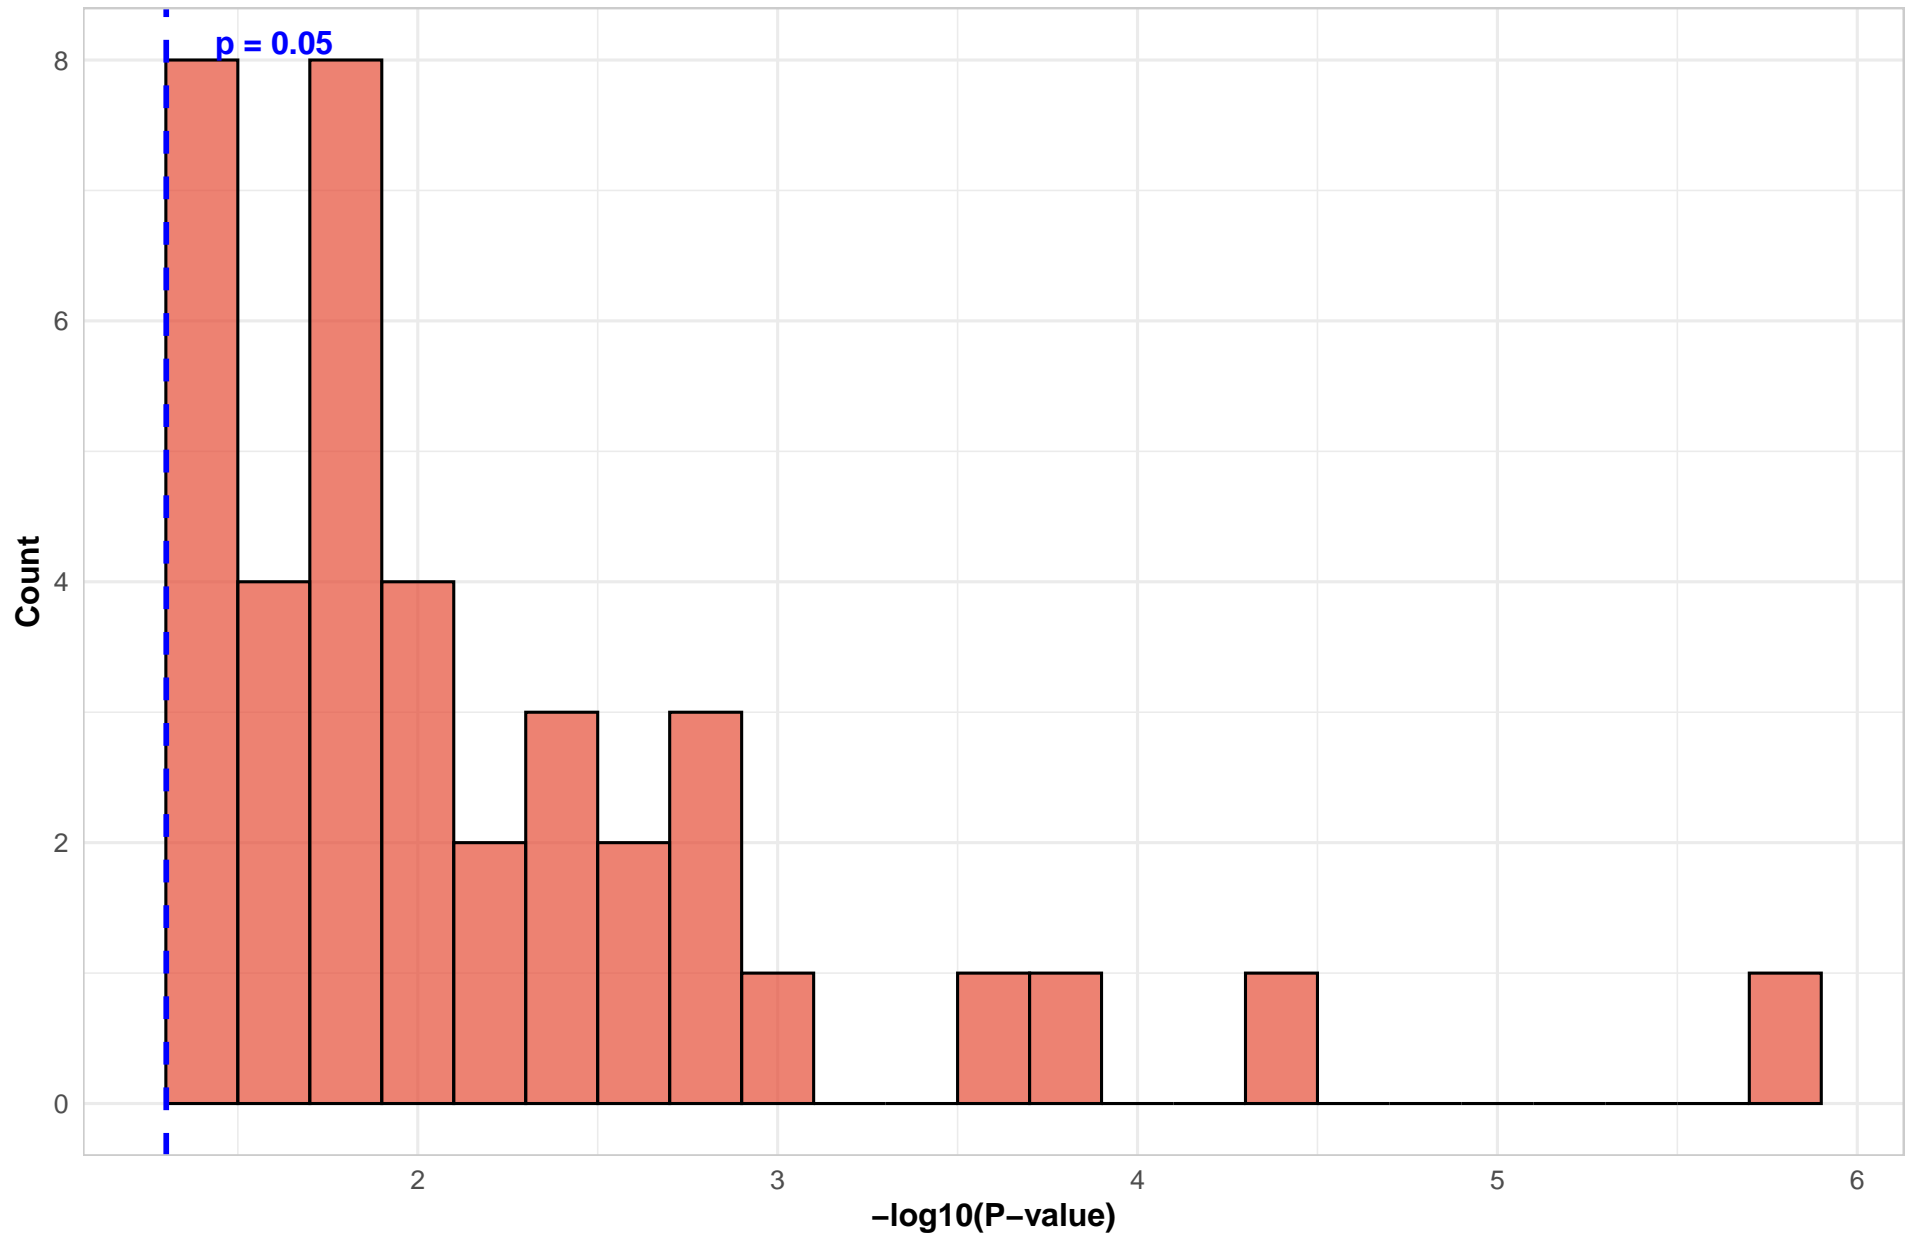

Supplement: Supplementary file 3 [file 9705e2e802a9363097859b8f.pdf]
